# Supplementary material
Source: PubMed Central journal article supplement (PMC3683745)
Supplement: 1302575110_pnas.201302575SI.pdf [file 1302575110_pnas.201302575SI.pdf]

# Supporting Information

Solomon et al. 10.1073/pnas.1302575110

## Other Supporting Information Files

[Dataset S1 \(XLSX\)](#)
